# Supplementary material for: Anti-Tuberculous Activity of Treponemycin Produced by a Streptomyces Strain MS-6-6 Isolated from Saudi Arabia
Source: PubMed Central journal article supplement (PMC6272392; doi:10.3390/molecules20022576), 2015-02-02
Supplement: molecules-20-02576-s001.pdf [file molecules-20-02576-s001.pdf]

## Supplementary Information

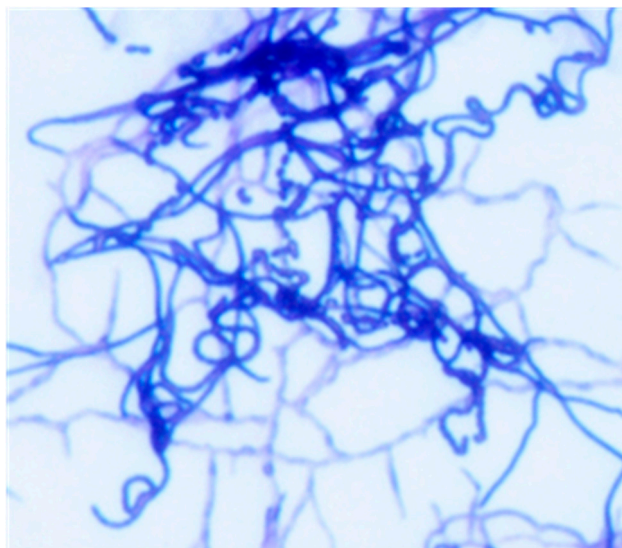

**Figure S1.** Photograph of *Streptomyces* strain MS-6-6 as appeared under light microscope.

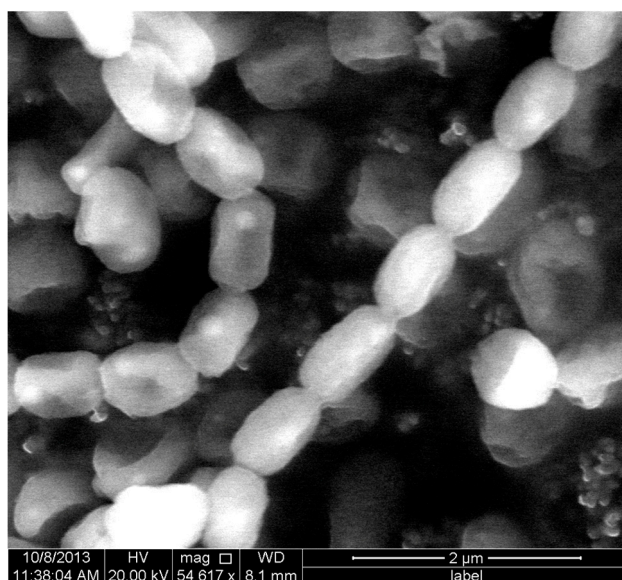

**Figure S2.** Electrographs of the spores of *Streptomyces* strain MS-6-6 as appeared under scanning electron microscope, 54,000 $\times$ .

Dr.Hossam  
 Sample: A4-MY CDCL3  
 @PROTON\_NS1\_KAAU CDCL3 {D:\outside} jaber 7

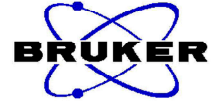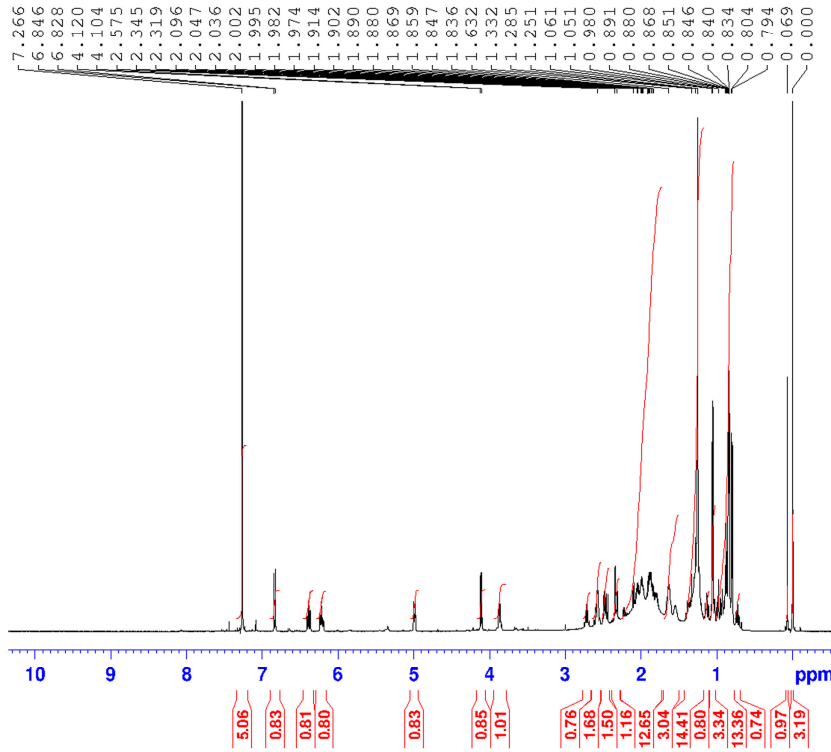

```

NAME      Hossam  A4 MY  27 04 2013
EXPNO    10
PROCNO   1
Date_    20130427
Time     15.19
INSTRUM  spect
PROBHD   5 mm CDCl3 13C
PULPROG  zg30
TD        65536
SOLVENT  CDCL3
NS        32
DS        2
SWH       12335.526 Hz
FIDRES   0.188225 Hz
AQ        2.6584426 sec
RG        57
DW        40.533 usec
DE        12.00 usec
TE        294.1 K
D1        1.0000000 sec
TU0       1
    
```

----- CHANNEL f1 -----

```

NUC1      1H
P1        9.90 usec
PL1       0.10 dB
PL12      19.62554169 W
SFO1      600.0842006 MHz
SI        32768
SF        600.0800174 MHz
WDW       EM
SSB       0
LB        0.30 Hz
GB        0
PC        2.00
    
```

Figure S3. <sup>1</sup>H-NMR of compound (MYA-3) (CDCl<sub>3</sub>).

Dr.Hossam  
 Sample: A4-MY CDCL3  
 @HSQCEDsp\_NS2\_KAAU CDCL3 {D:\outside} jaber 2

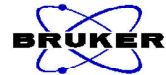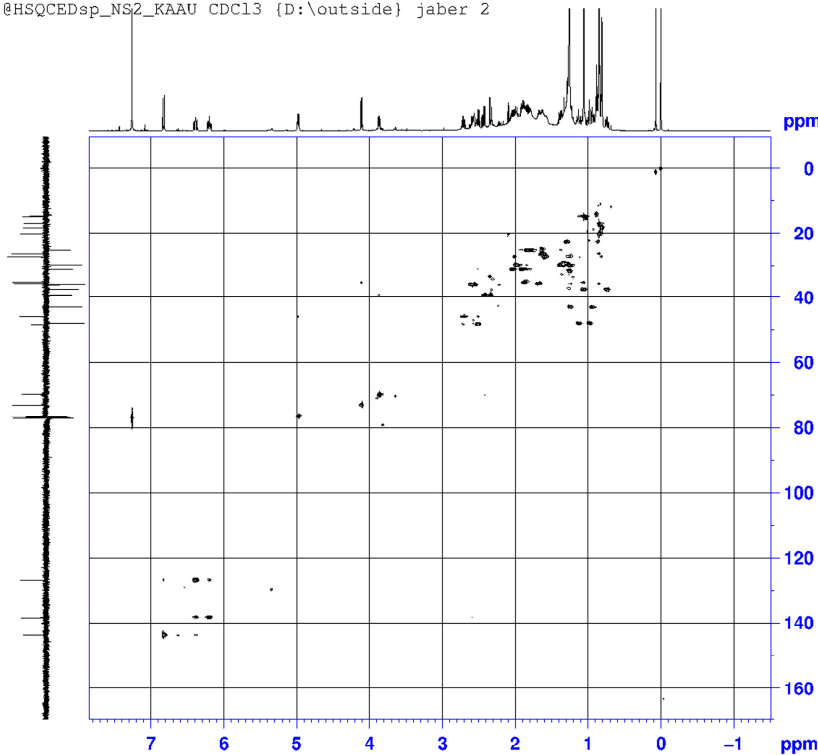

```

NAME      Hossam  A4 MY  30 04 2013
EXPNO    15
PROCNO   1
Date_    20130430
Time     19.30
INSTRUM  spect
PROBHD   5 mm CDCl3 13C
PULPROG  hsqcedspzb.2
TD        268
SOLVENT  CDCL3
NS        64
DS        4
SWH       5617.476 Hz
FIDRES   2.743133 Hz
AQ        0.1832210 sec
RG        263
DW        89.000 usec
DE        12.00 usec
TE        312.0 K
CHSR2    145.800000 Hz
CHSR1    1.0000000 Hz
D0        0.0000300 sec
D1        1.9882950 sec
D2        0.0017264 sec
D3        0.0000000 sec
D4        0.0002000 sec
D5        0.0004000 sec
D6        0.0008000 sec
D7        0.0016000 sec
D8        0.0032000 sec
D9        0.0064000 sec
D10       0.0128000 sec
D11       0.0256000 sec
D12       0.0512000 sec
D13       0.1024000 sec
D14       0.2048000 sec
D15       0.4096000 sec
D16       0.8192000 sec
D17       1.6384000 sec
D18       3.2768000 sec
D19       6.5536000 sec
D20       13.1072000 sec
D21       26.2144000 sec
D22       52.4288000 sec
D23       104.8576000 sec
D24       209.7152000 sec
D25       419.4304000 sec
D26       838.8608000 sec
D27       1677.7216000 sec
D28       3355.4432000 sec
D29       6710.8864000 sec
D30       13421.7728000 sec
D31       26843.5456000 sec
D32       53687.0912000 sec
D33       107374.1824000 sec
D34       214748.3648000 sec
D35       429496.7296000 sec
D36       858993.4592000 sec
D37       1717986.9184000 sec
D38       3435973.8368000 sec
D39       6871947.6736000 sec
D40       13743895.3472000 sec
D41       27487790.6944000 sec
D42       54975581.3888000 sec
D43       109951162.7776000 sec
D44       219902325.5552000 sec
D45       439804651.1104000 sec
D46       879609302.2208000 sec
D47       1759218604.4416000 sec
D48       3518437208.8832000 sec
D49       7036874417.7664000 sec
D50       14073748835.5328000 sec
D51       28147497671.0656000 sec
D52       56294995342.1312000 sec
D53       112589990684.2624000 sec
D54       225179981368.5248000 sec
D55       450359962737.0496000 sec
D56       900719925474.0992000 sec
D57       1801439850948.1984000 sec
D58       3602879701896.3968000 sec
D59       7205759403792.7936000 sec
D60       14411518807585.5872000 sec
D61       28823037615171.1744000 sec
D62       57646075230342.3488000 sec
D63       115292150460684.6976000 sec
D64       230584300921369.3952000 sec
D65       461168601842738.7904000 sec
D66       922337203685477.5808000 sec
D67       1844674407370955.1616000 sec
D68       3689348814741910.3232000 sec
D69       7378697629483820.6464000 sec
D70       14757395259767641.2928000 sec
D71       29514790519535282.5856000 sec
D72       59029581039070565.1712000 sec
D73       118059162078141130.3424000 sec
D74       236118324156282260.6848000 sec
D75       472236648312564521.3696000 sec
D76       944473296625129042.7392000 sec
D77       1888946593250258085.4784000 sec
D78       3777893186500516170.9568000 sec
D79       7555786373001032341.9136000 sec
D80       15111572746002064683.8272000 sec
D81       30223145492004129367.6544000 sec
D82       60446290984008258735.3088000 sec
D83       120892581968016517470.6176000 sec
D84       241785163936033034941.2352000 sec
D85       483570327872066069882.4704000 sec
D86       967140655744132139764.9408000 sec
D87       1934281311488264279529.8816000 sec
D88       3868562622976528559059.7632000 sec
D89       7737125245953057118119.5264000 sec
D90       1547425049190611423623.0528000 sec
D91       3094850098381222847246.1056000 sec
D92       6189700196762445694492.2112000 sec
D93       12379400393524891388984.4224000 sec
D94       24758800787049782777968.8448000 sec
D95       49517601574099565555937.6896000 sec
D96       99035203148199131111875.3792000 sec
D97       198070406296398262223750.7584000 sec
D98       396140812592796524447501.5168000 sec
D99       792281625185593048895003.0336000 sec
D100      1584563250371186097790006.0672000 sec
D101      3169126500742372195580012.1344000 sec
D102      6338253001484744391160024.2688000 sec
D103      12676506002969488782320048.5376000 sec
D104      25353012005938977564640097.0752000 sec
D105      50706024011877955129280194.1504000 sec
D106      101412048023755910258560388.3008000 sec
D107      202824096047511820517120776.6016000 sec
D108      405648192095023641034241553.2032000 sec
D109      811296384190047282068483106.4064000 sec
D110      1622592768180094564136966212.8128000 sec
D111      3245185536360189128273932425.6256000 sec
D112      6490371072720378256547864851.2512000 sec
D113      12980742145440756513095729702.5024000 sec
D114      25961484290881513026191459405.0048000 sec
D115      51922968581763026052382918810.0096000 sec
D116      103845937163526052104765837620.0192000 sec
D117      207691874327052104209531675240.0384000 sec
D118      415383748654104208419063400480.0768000 sec
D119      830767497308208416838126800960.1536000 sec
D120      166153499461641683676453601920.3072000 sec
D121      332306998923283367352907203840.6144000 sec
D122      664613997846566734705814407680.1228000 sec
D123      1329227995693133469411628815360.2456000 sec
D124      265845599138626693882325762720.4912000 sec
D125      531691198277253387764651525440.9824000 sec
D126      1063382396554506775529303050880.1948000 sec
D127      2126764793109013510458606101160.3896000 sec
D128      4253529586218027020917212202320.7792000 sec
D129      8507059172436054041834424404640.1558000 sec
D130      17014118344872108083668848809280.3116000 sec
D131      34028236689744216167337697618560.6232000 sec
D132      68056473379488432334675395237120.1246000 sec
D133      136112946758976864669350790474240.2492000 sec
D134      272225893517953729338701580948480.4984000 sec
D135      544451787035907458677403161896960.9968000 sec
D136      1088903574071814917354806323793920.1936000 sec
D137      2177807148143629834709612647587840.3872000 sec
D138      4355614296287259669419225315175680.7744000 sec
D139      8711228592574519338838450630351360.1488000 sec
D140      17422457185549038677676901260702720.2976000 sec
D141      34844914371098077355353802521405440.5952000 sec
D142      69689828742196154710707605042810880.1190000 sec
D143      139379657484392309421415210085621760.2380000 sec
D144      278759314968784618842830420171243520.4760000 sec
D145      557518629937569237685660840342487040.9520000 sec
D146      111503725987513847537132168068497408.1940000 sec
D147      223007451975027695074264336136994816.3880000 sec
D148      446014903950055390148528672273989632.7760000 sec
D149      892029807900110780297057344547979264.1520000 sec
D150      178405961580022156059411468909595232.3040000 sec
D151      356811923160044312118822837817919044.6080000 sec
D152      71362384632008862423764567563838008.2160000 sec
D153      142724769264017724875329135127676016.4320000 sec
D154      285449538528035449750658270255352032.8640000 sec
D155      570899077056070899501316540510704064.7280000 sec
D156      114179815411214179900263308021408128.1456000 sec
D157      2283596308224283598005266160042816.2912000 sec
D158      456719261644856719601053232008563.5824000 sec
D159      913438523289713439202106464017113.1648000 sec
D160      1826877046579426878404212828034226.3296000 sec
D161      365375409315885375680842565606845.6592000 sec
D162      73075081863177075136168513121373.3184000 sec
D163      146150163726354150272337026242746.6368000 sec
D164      29230032745270830054467405248549.2736000 sec
D165      58460065490541660108934810497098.5472000 sec
D166      11692013098108330021788968099419.0944000 sec
D167      23384026196216660043577936198838.1888000 sec
D168      46768052392433320087155873397677.3776000 sec
D169      93536104784866640174311756795354.7552000 sec
D170      18707220956973328034862351349069.5104000 sec
D171      37414441913946656069724702698139.0208000 sec
D172      74828883827893312139449405396278.0416000 sec
D173      14965776765778662427889880679255.6832000 sec
D174      299315535315573248557797613585.3664000 sec
D175      598631070631146497115595227171.7328000 sec
D176      119726214126229299423119045434.4656000 sec
D177      23945242825245859884623809086.9312000 sec
D178      47890485650491719769247618173.8624000 sec
D179      95780971300983439538495236347.7248000 sec
D180      191561942601966879076990472695.4496000 sec
D181      383123885203933758153980945390.8992000 sec
D182      766247770407867516307961890781.7984000 sec
D183      153249554081573503261593781576.3968000 sec
D184      306499108163147006523187563153.7936000 sec
D185      612998216326294013046375126307.5872000 sec
D186      122599643265258802609275025261.1744000 sec
D187      245199286530517605218550050522.3488000 sec
D188      490398573061035210437100101044.6976000 sec
D189      980797146122070420874200202089.3952000 sec
D190      1961594292444140841548400404178.7904000 sec
D191      3923188584888281683096800808357.5808000 sec
D192      784637716977656336619360161671.1616000 sec
D193      1569275433955312673387320323342.3232000 sec
D194      3138550867910625346774640646684.6464000 sec
D195      6277101735821250693549281293368.2928000 sec
D196      12554203471642501387098562586736.5856000 sec
D197      2510840694328500277419713517347.1712000 sec
D198      502168138865700055483942703469.3424000 sec
D199      1004336277731400110967885406938.6848000 sec
D200      20086725554628002219357708138.1376000 sec
D201      40173451109256004438715416277.2752000 sec
D202      80346902218512008877430832554.5504000 sec
D203      16069380443702401775486166109.1008000 sec
D204      32138760887404803550972332218.2016000 sec
D205      64277521774809607101944664436.4032000 sec
D206      128555043549619214203889328872.8064000 sec
D207      25711008709923842840777865774.6128000 sec
D208      5142201741984768568155573554.9256000 sec
D209      10284403483969537137111147109.8512000 sec
D210      20568806967939074274222294219.7024000 sec
D211      41137613935878148548444588439.4048000 sec
D212      82275227871756297096889176878.8096000 sec
D213      16455045574351259419377835375.6192000 sec
D214      32910091148702518838755670751.2384000 sec
D215      65820182297405037677511341502.4768000 sec
D216      131640364594810075355022683004.9536000 sec
D217      263280729189620150710045366009.9072000 sec
D218      526561458379240301420090732019.8144000 sec
D219      1053122916784806022840181464039.6288000 sec
D220      2106245833569612045680362928079.2576000 sec
D221      4212491667139224091360725856155.5152000 sec
D222      842498333427844818272145171231.0304000 sec
D223      168499666685568963654429034246.0608000 sec
D224      336999333371137927308858068492.1216000 sec
D225      673998666742275854617716176984.2432000 sec
D226      134799733348455170923543335396.4864000 sec
D227      269599466696910341847086670792.9728000 sec
D228      539198933393820683694173341585.9456000 sec
D229      1078397866787641367388346683171.8912000 sec
D230      2156795733575282734776693366343.7824000 sec
D231      431359146715056546955338673268.5648000 sec
D232      862718293430113093910677346537.1296000 sec
D233      1725436586860226187821354693074.2592000 sec
D234      3450873173720452375642709386148.5184000 sec
D235      690174634744090475128541877237.0368000 sec
D236      138034926948818095025708355447.0736000 sec
D237      276069853897636190051416710894.1472000 sec
D238      55213970779527238010283342178.2944000 sec
D239      110427941559054476020566684356.5888000 sec
D240      220855883118108952041133368713.1776000 sec
D241      44171176623621790408226673742.3552000 sec
D242      88342353247243580816453347484.7104000 sec
D243      176684706494487161632906694969.4208000 sec
D244      353369412988974323265813389938.8416000 sec
D245      70673882597794864653162677987.6832000 sec
D246      141347765195589729306325355975.3664000 sec
D247      282695530391179458612650711950.7328000 sec
D248      565391060782358917225301423901.4656000 sec
D249      113078212156471783445060284780.9312000 sec
D250      226156424312943566890120569561.8624000 sec
D251      452312848625887133780241139123.7248000 sec
D252      904625697251774267560482278247.4496000 sec
D253      180925139450354853512096455649.8992000 sec
D254      36185027890070970702419291129.7984000 sec
D255      72370055780141941404838582259.5968000 sec
D256      14474011156028382880967716459.1936000 sec
D257      28948022312056765761935432918.3872000 sec
D258      57896044624113531533870865836.7744000 sec
D259      11579208924822706306774173173.5488000 sec
D260      23158417849645412613548346346.0976000 sec
D261      46316835699290825227096692692.1952000 sec
D262      92633671398581650454193385384.3904000 sec
D263      18526734279716330090838676876.7808000 sec
D264      37053468559432660181677353753.5616000 sec
D265      74106937118865320363354707507.1232000 sec
D266      148213874377730640726709415014.2464000 sec
D267      296427748755461281453418830028.4928000 sec
D268      592855497510922562906837660056.9856000 sec
D269      1185710995021845125813755320113.9712000 sec
D270      237142199004369025162751064022.7424000 sec
D271      474284398008738050325502128045.4848000 sec
D272      948568796017476100651004256090.9696000 sec
D273      189713759203495220130200851218.1392000 sec
D274      37942751840699044026040170243.2784000 sec
D275      75885503681398088052080340486.5568000 sec
D276      151771007362796176104160680973.113
```

Dr.Hossam  
 Sample: A4-MY CDCL3  
 @HMBCgplp2nd\_NS4\_KAAU CDC13 {D:\outside} jaber 2

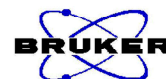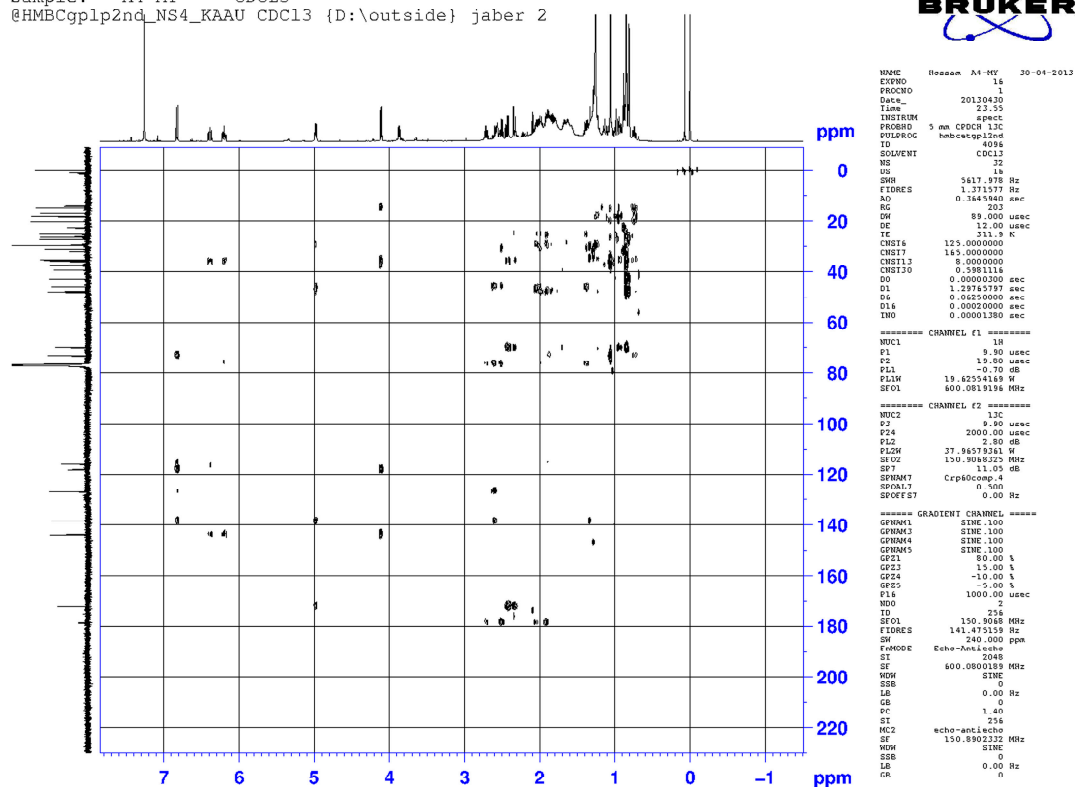

Figure S5. HMBC of compound (MYA-3) (CDCl<sub>3</sub>).

Dr.Hossam  
 Sample: A4-MY CDCL3  
 @COSY\_NS2\_KAAU CDC13 {D:\outside} jaber 2

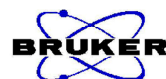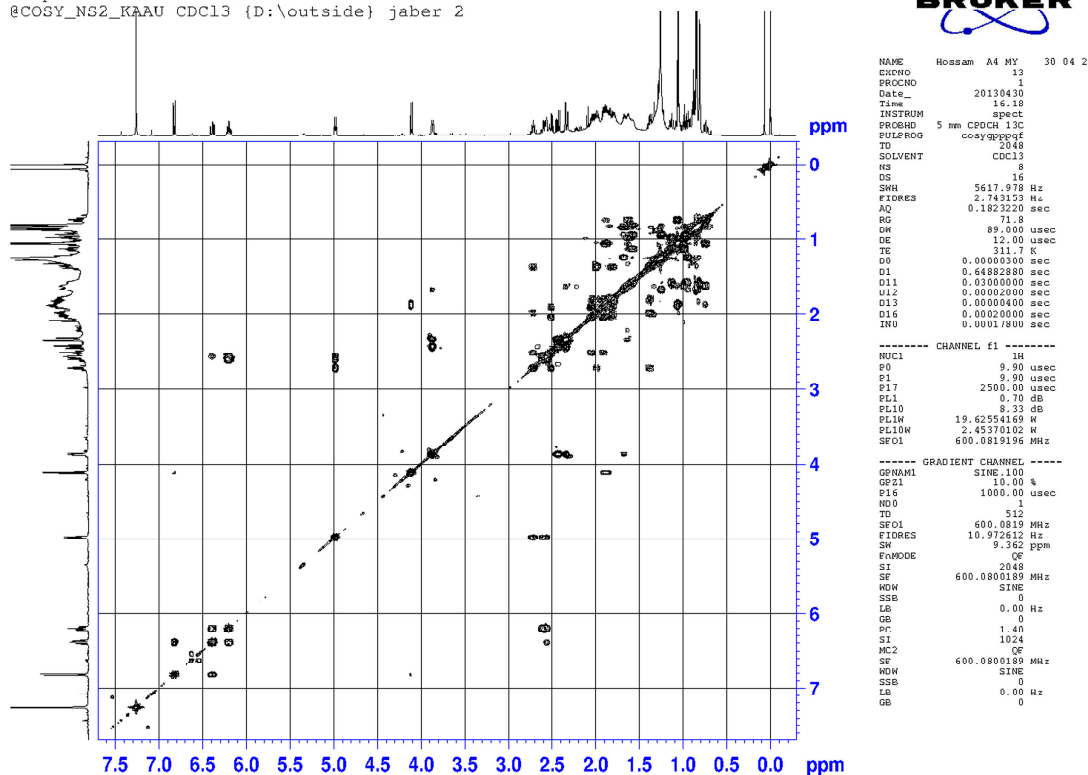

Figure S6. COSY of compound (MYA-3) (CDCl<sub>3</sub>).

Dr.Hossam  
 Sample: A4-MY CDCL3  
 @NOESY\_NS4\_KAAU CDC13 {D:\outside} jaber 2

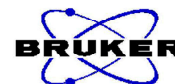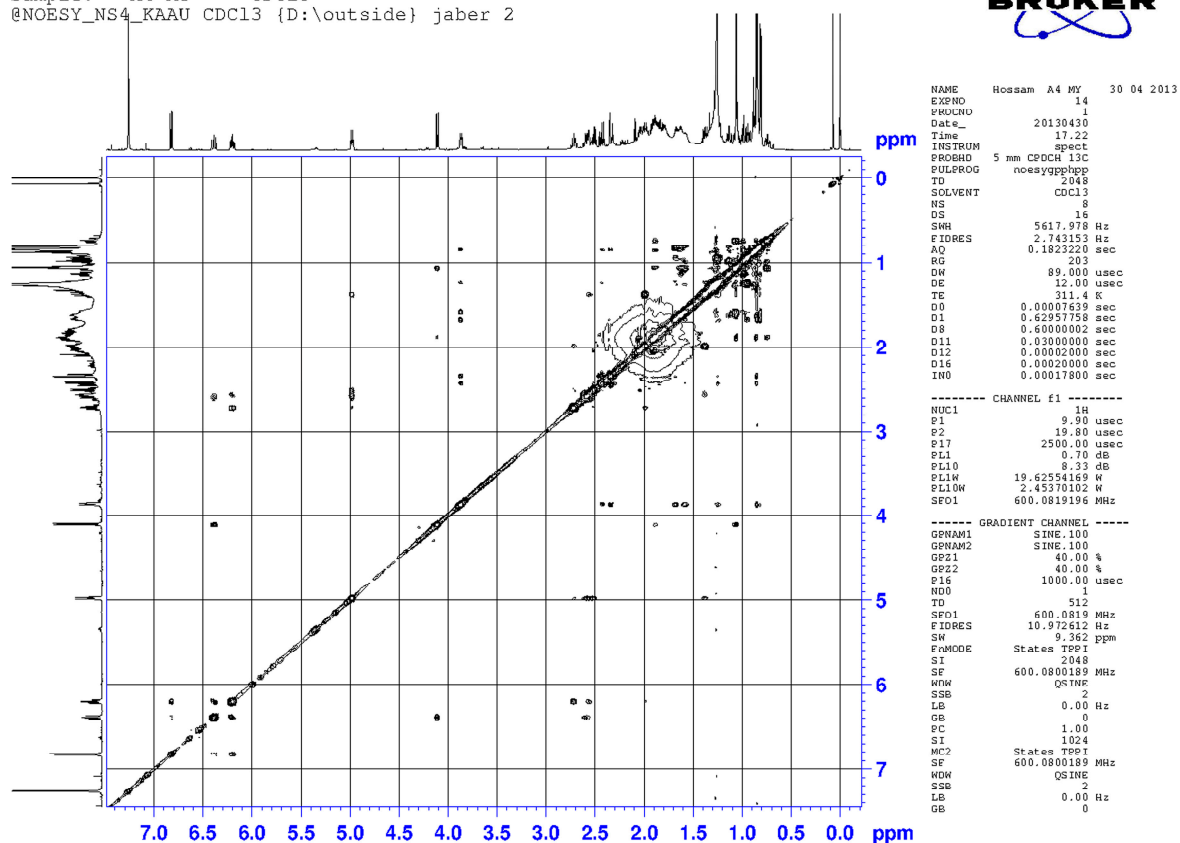

Figure S7. NOESY of compound (MYA-3) (CDCl<sub>3</sub>).

Table S1. The *Streptomyces* isolates that showed different degrees of anti-tuberculous activity.

| Level of Activity<br>(Inhibition Zones/mm) | Number of Isolates in Each City |            |        |        |        | Total |
|--------------------------------------------|---------------------------------|------------|--------|--------|--------|-------|
|                                            | Jeddah                          | Al-Medinah | Makkah | Altaif | Rabigh |       |
| Weak ( $\leq 15$ mm)                       | 39                              | 23         | 14     | 38     | 4      | 118   |
| Intermediate (15–20 mm)                    | 11                              | 6          | 4      | 6      | 2      | 29    |
| Strong ( $\geq 20$ mm)                     | 3                               | 2          | 1      | 1      | 1      | 8     |
| Total                                      | 53                              | 31         | 19     | 45     | 7      | 155   |

**Table S2.** Morphological and physiological properties of the *Streptomyces* strain MS-6-6.

| Characters                 | Results                                                                                                                                                                                 |
|----------------------------|-----------------------------------------------------------------------------------------------------------------------------------------------------------------------------------------|
| Spores                     | Spores have Rectiflexibles spore chains, (straight to flexuous). Spore surface is smooth to slightly warty.<br>Spore mass is gray.<br>Reverse color is light brown diffusible pigments. |
| Growth temperature range   | Growth occurred at 20, 25, 30 and 37 but no at 50 °C                                                                                                                                    |
| Growth pH range            | Growth occurred at the pH range of 5.7–8.4, optimum growth was at pH 7                                                                                                                  |
| Oxygen requirement         | No growth occurred under anaerobic condition                                                                                                                                            |
| Starch hydrolysis          | Positive                                                                                                                                                                                |
| Gelatin hydrolysis         | Positive                                                                                                                                                                                |
| Casein hydrolysis          | Positive                                                                                                                                                                                |
| Nitrate reduction          | Negative                                                                                                                                                                                |
| H <sub>2</sub> S formation | Negative                                                                                                                                                                                |
| Cellulose utilization      | Negative                                                                                                                                                                                |
| Melanin production         | Negative                                                                                                                                                                                |

**Table S3.** Utilization of compounds as a sole source of carbon by *Streptomyces* strain MS-6-6.

| Carbon Source | Results |
|---------------|---------|
| No carbon     | (-)     |
| D-Glucose     | (+)     |
| D-Fructose    | (+)     |
| Lactose       | (+)     |
| Sucrose       | (-)     |
| Raffinose     | (+/-)   |
| D-Mannitol    | (+)     |
| meso-Inositol | (-)     |
| L-Arabinose   | (+)     |
| Salicin       | (+)     |
| D-Galactose   | (+)     |
| Maltose       | (+)     |
| Dextrine      | (+)     |
| Cellulose     | (-)     |
| Starch        | (+)     |

(+) = visible growth; (-) = no growth.

**Table S4.** Susceptibility of the *Streptomyces* MS-6-6 to different antibiotics.

| Antibiotic                  | Code | Sensitivity | Antibiotic                    | Code | Sensitivity |
|-----------------------------|------|-------------|-------------------------------|------|-------------|
| Cefuroxime                  | CXA  | R           | Levofloxacin                  | LEV  | S           |
| Cephalothin                 | KF   | R           | Norfloxacin                   | NOR  | S           |
| Cefoxitin                   | FOX  | R           | Ciprofloxacin                 | CIP  | S           |
| Imipenem                    | IPM  | R           | Ofloxacin                     | OFX  | S           |
| Ceftazidim                  | CAZ  | R           | Moxifloxacin                  | MXF  | S           |
| Ceftriaxone                 | CRO  | R           | Nalidixic acid                | NA   | R           |
| Amoxicillin clavulanic acid | AMA  | R           | Sulfamethoxazol/Trimethoprine | SXT  | S           |
| Oxacillin                   | OX   | R           | Doxycycline                   | DO   | S           |
| Piperacillin                | PRL  | R           | Tobramycin                    | TOB  | S           |
| Aztreonam                   | ATM  | R           | Streptomycin                  | S    | S           |
| Cloxacillin                 | OB   | R           | Gentamicin                    | CN   | S           |
| Bacitracin                  | B    | R           | Novobiocin                    | NV   | S           |
| Aminocidin                  | AN   | S           | Metronidazol                  | MET  | R           |
| Fucidic acid                | FD   | R           | Rifampicin                    | RA   | R           |
| Teicoplanin                 | TEC  | S           | Chloramphenicol               | C    | R           |

Sensitive (S)  $\geq$  15 mm; Resistance (R)  $<$  15 mm.

**Table S5.** Antimicrobial activities of the A-1, A-2, and A-3 fractions.

| Organisms                         | Inhibition Zones (mm) |     |     |
|-----------------------------------|-----------------------|-----|-----|
|                                   | A-1                   | A-2 | A-3 |
| <i>Mycobacterium tuberculosis</i> | --                    | 14  | 24  |
| <i>Staphylococcus epidermidis</i> | --                    | 15  | 22  |
| <i>Streptococcus pyogenes</i>     | --                    | 14  | 20  |
| <i>Bacillus subtilis</i>          | --                    | 13  | 19  |
| <i>Escherichia coli</i>           | --                    | 11  | 17  |
| <i>Clostridium perfringens</i>    | --                    | --  | 15  |
| <i>Brucella melitensis</i>        | --                    | --  | 16  |
| <i>Pseudomonas aeruginosa</i>     | --                    | --  | 15  |
| <i>Proteus mirabilis</i>          | --                    | 11  | 16  |
| <i>Candida albicans</i>           | --                    | --  | 15  |

A-1, A-2 and A-3 are fractions collected after application of MS-6-6 growth supernatant on Diaion HP-20 using water, methanol/water and methanol, respectively.
